# Supplementary material for: Increased UCP1 expression in the perirenal adipose tissue of patients with renal cell carcinoma
Source: PubMed Central journal article supplement — Oncol Rep. 2019 Sep 10;42(5):1972–80. doi: 10.3892/or.2019.7306 (PMC6775817; doi:10.3892/or.2019.7306), 2019-09-10
Supplement: Supplementary_Data.pdf [file Supplementary_Data.pdf]

Figure S1. Association between BMI and Fuhrman grade. There was no correlation between BMI and Fuhrman grade.  $r$  is the Spearman correlation coefficient and  $P < 0.05$  indicates the significance level ( $n=50$ ). BMI, body mass index.

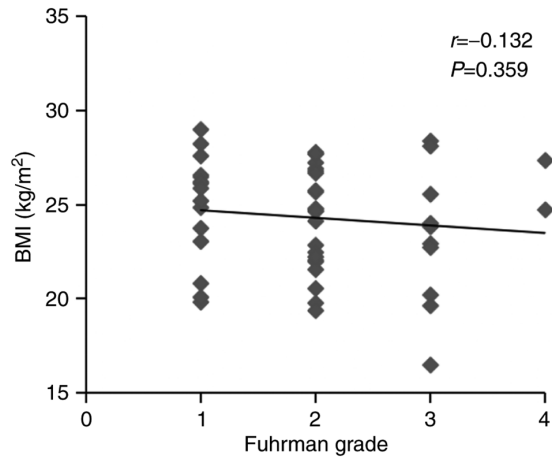

Figure S2. Association between BMI and T stage. There was no correlation between BMI and T stage.  $r$  is the Spearman correlation coefficient and  $P < 0.05$  indicates the significance level ( $n=50$ ). BMI, body mass index.

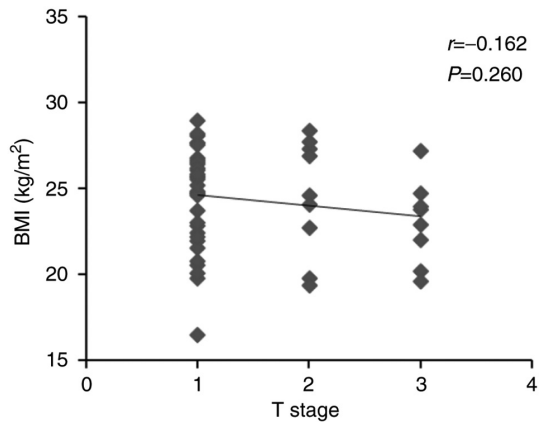

Table SI. Primers used in the present study.

| Gene                | Primer sequences                                                                    |
|---------------------|-------------------------------------------------------------------------------------|
| Homo $\beta$ -actin | Forward: 5'-ATTGGCAATGAGCGGTTCCGC-3'<br>Reverse: 5'-CTCCTGCTTGCTGATCCACATC-3'       |
| Homo UCP1           | Forward: 5'-CACCTTCCCGCTGGACACT-3'<br>Reverse: 5'-CCCTAGGACACCTTTATACCTAATGG-3'     |
| Homo PGC1 $\alpha$  | Forward: 5'-FW: TCTGAGTCTGTATGGAGTGACAT-3'<br>Reverse: 5'-CCAAGTCGTTACATCTAGTTCA-3' |
| Homo CIDEA          | Forward: 5'-GATGCCCTCGTCATCGCTAC-3'<br>Reverse: 5'-GCGTGTGTCTCCCAAGGTC-3'           |
| Homo PRDM16         | Forward: 5'-CGAGGCCCTGTCTACATTC-3'<br>Reverse: 5'-GCTCCCATCCGAAGTCTGTC-3'           |
| Homo ZIC1           | Forward: 5'-CACGCGGGACTTTCTGTTC-3'<br>Reverse: 5'-TGCCCGTTGACCACGTTAG-3'            |
| Homo TMEM26         | Forward: 5'-TGAGACGGCCAAAGTTTTTGT-3'<br>Reverse: 5'-TGGGTAGAAGCCATCTTCCAA-3'        |
| Homo TBX1           | Forward: 5'-TAGCGAGAAATATGCCGAGGA-3'<br>Reverse: 5'-CGTGATCCGATGGTTCTGGT-3'         |
| Homo CD137          | Forward: 5'-AGCTGTTACAACATAGTAGCCAC-3'<br>Reverse: 5'-GGACAGGGACTGCAAATCTGAT-3'     |
| Homo HOXC9          | Forward: 5'-ACTCGCTCATCTCTCACGACA-3'<br>Reverse: 5'-GACGGAAAATCGCTACAGTCC-3'        |
| Homo HOXC8          | Forward: 5'-AACTCAGGCTACCAGCAGAAC-3'<br>Reverse: 5'-TGAGCCCCATAAAGGGACTGT-3'        |
| Homo TNF- $\alpha$  | Forward: 5'-CCCCAGGGACCTCTCTAAT-3'<br>Reverse: 5'-GGTTTGCTACAACATGGGCTAC-3'         |
| Homo MCP-1          | Forward: 5'-TGTCCCAAAGAAGCTGTGATCT-3'<br>Reverse: 5'-GGAATCCTGAACCCACTTCTG-3'       |
| Homo EMR1           | Forward: 5'-CAGCGTTCTGGACAAAGTGTG-3'<br>Reverse: 5'-CGGAGTGATATTTGCTGAGGGT-3'       |
| Homo IL-10          | Forward: 5'-GACTTTAAGGGTTACCTGGGTTG-3'<br>Reverse: 5'-TCACATGCGCCTTGATGTCTG-3'      |
| Homo IL-6           | Forward: 5'-TTCAATGAGGAGACTTGCC-3'<br>Reverse: 5'-TGACCAGAAGAAGGAATGC-3'            |
| Homo AP2            | Forward: 5'-ACTGGGCCAGGAATTTGACG-3'<br>Reverse: 5'-CTCGTGGAAGTGACGCCTT-3'           |
| Homo HSL            | Forward: 5'-TCAGTGTCTAGGTCAGACTGG-3'<br>Reverse: 5'-AGGCTTCTGTTGGGTATTGGA-3'        |
| Homo RETN           | Forward: 5'-CTGTTGGTGTCTAGCAAGACC-3'<br>Reverse: 5'-CCAATGCTGCTTATTGCCCTAAA-3'      |
| Homo ADIPOQ         | Forward: 5'-CGTGATGGCAGAGATGGC-3'<br>Reverse: 5'-CCGGTTTCACCGATGTCT-3'              |
| Homo LEP            | Forward: 5'-CACCAAACCCTCATCAAGACA-3'<br>Reverse: 5'-CTTTCTGTTTGGAGGAGACTGACT-3'     |
| Homo COX7A1         | Forward: 5'-CCGCTTTCAGAACCGAGTG-3'<br>Reverse: 5'-CCCTTCAGGTACAACGGGA-3'            |
| Homo CS             | Forward: 5'-TGCTTCCTCCACGAATTTGAAA-3'<br>Reverse: 5'-CCACCATACATCATGTCCACAG-3'      |
| Homo CYC1           | Forward: 5'-CTTCGCGGGGTAGTGTGG-3'<br>Reverse: 5'-GGCCAGACTTCGACGACAA-3'             |
| Homo LCAD           | Forward: 5'-GGTGTTCATCAGTAATGGGTCAT-3'<br>Reverse: 5'-CACTGTCTGTAGGTGAGCAACTG-3'    |
| Homo PDK4           | Forward: 5'-GGAGCATTTCTCGCGCTACA-3'<br>Reverse: 5'-ACAGGCAATTCTTGTGCGCAA-3'         |
